# Supplementary material for: Local and Systemic Adverse Reactions to mRNA COVID-19 Vaccines Comparing Two Vaccine Types and Occurrence of Previous COVID-19 Infection
Source: MDPI journal article supplement (doi:10.3390/vaccines9121463), 2021-12-10
Supplement: s1 [file s1]

## Supplementary Materials

### Annex S1. Questionnaire

- Date of birth
- Sex: Women, Men, Non-binary
- Worker category: medical doctor, registered nurse, other (with patient contact), other (without patient contact).
- Have you ever experienced a severe allergy (anaphylactic shock or glottis edema)?: yes, no
- What caused this reaction?: medications, other
- Do you have or have had a chronic condition (such as cardiac insufficiency, ischemic heart disease, asthma, diabetes, chronic bronchitis, neurological disease, renal failure or chronic liver disease)?: yes, no
- Have you ever had COVID-19?: yes, no
- Date of COVID-19 diagnosis
- How serious were your COVID-19 symptoms?: asymptomatic infection, mild or moderate symptoms, hospitalization
- Which COVID-19 vaccine did you receive: Pfizer, Moderna, I don't know
- Date of vaccination
- Did you have adverse reactions to COVID-19 vaccine first dose: yes, no
- Which adverse reactions did you suffer (multiple choice):
  - Pain at injection site
  - Swelling or redness at injection site
  - Fatigue
  - Headache
  - Muscle or joint pain
  - Chills
  - Fever ( $\geq 37.5^{\circ}$ )
  - Nausea or vomiting
  - Adenopathy / swollen lymph nodes
  - Insomnia
  - Malaise
  - Hives or rash
- Date of onset of adverse reaction
- Date of end of adverse reaction
- Did you need a medical leave because of the adverse reactions?: yes, no
- Did you need medical attention because of the adverse reactions?: yes, no
- Was the adverse reaction life-threatening?: yes, no
- Do you allow us to access your clinical history?: yes, no
  - What is your health record ID code?

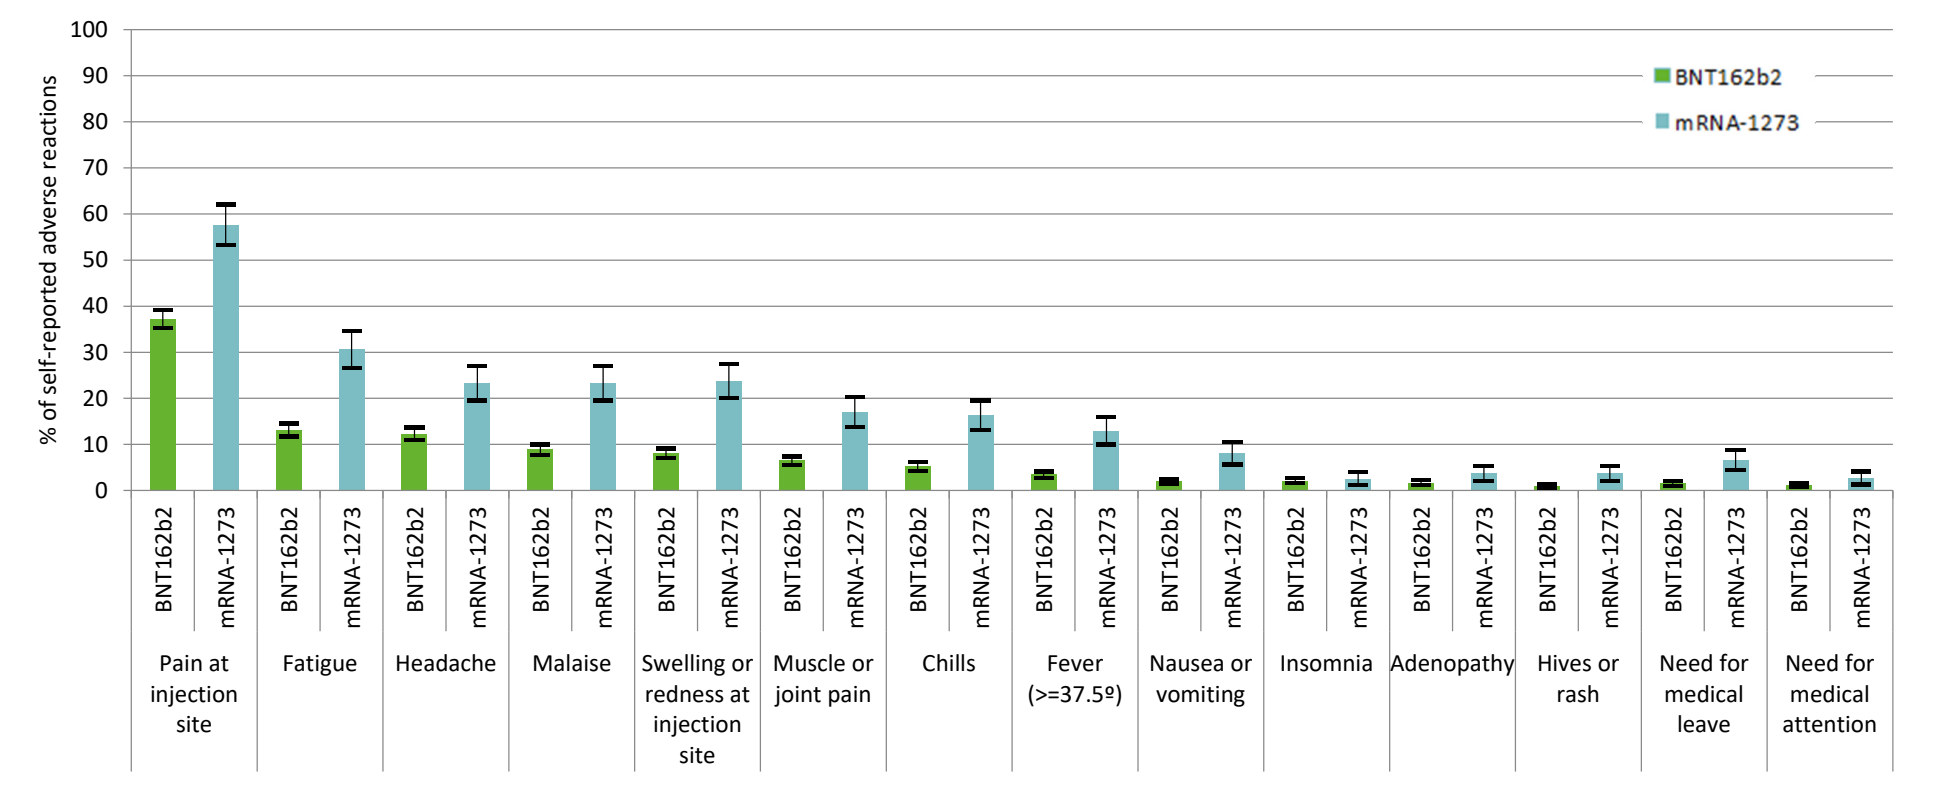

Annex S2: Percentage of self-reported adverse reactions by vaccine type, dose 1

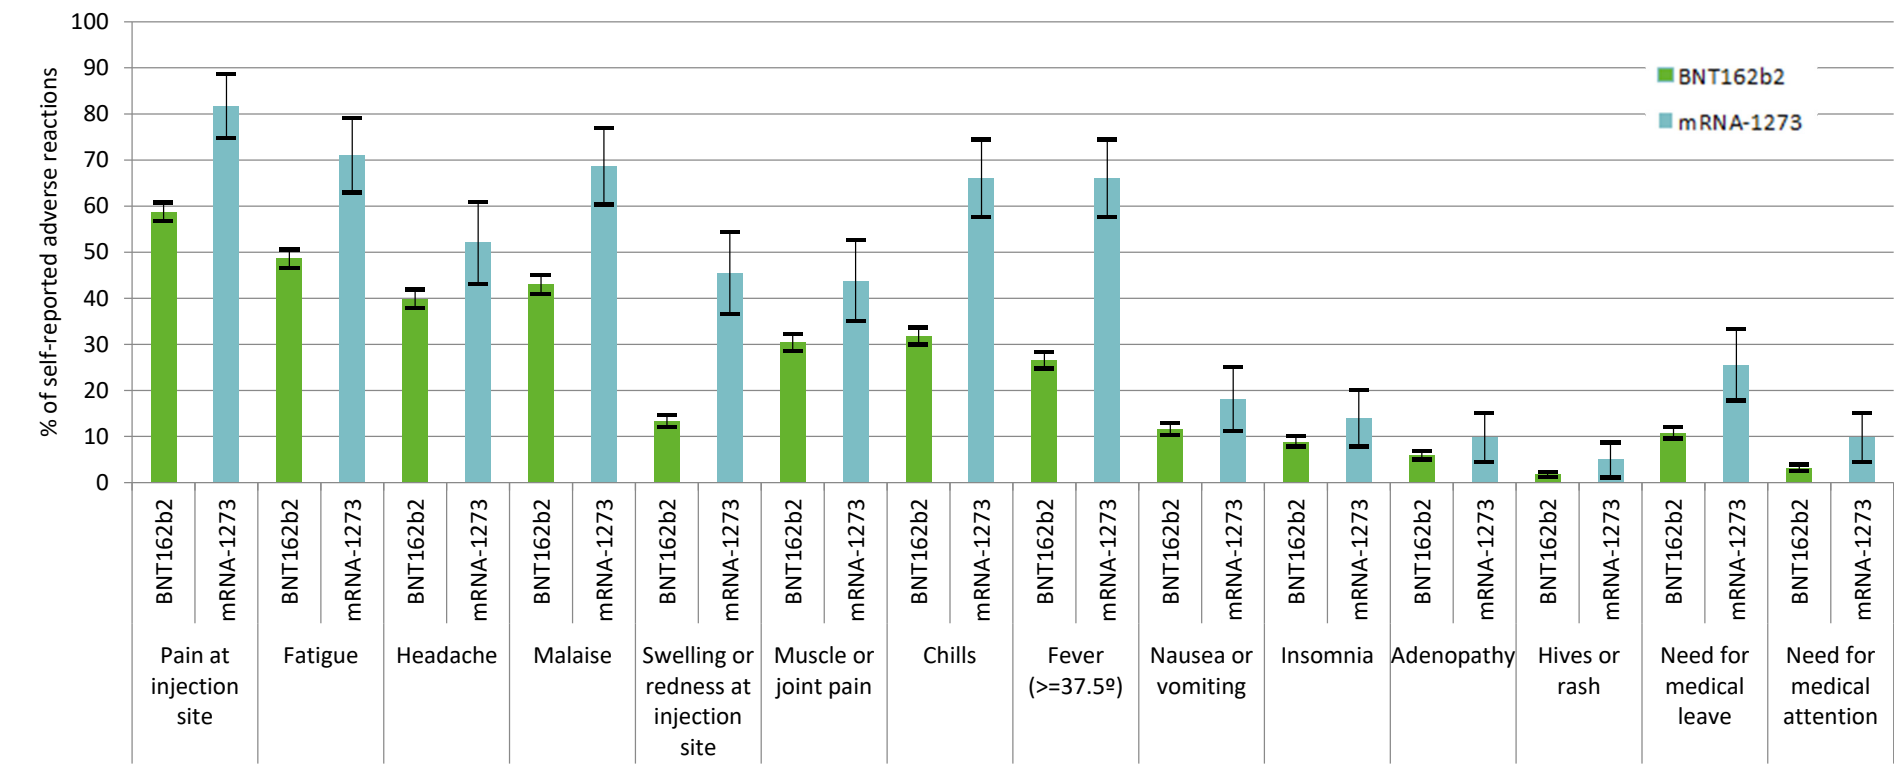

Annex S3: Percentage of self-reported adverse reactions by vaccine type, dose 2
